# Supplementary material
Source: PubMed Central journal article supplement (PMC9426555)
Supplement: msystems.00516-22-s0008.pdf [file msystems.00516-22-s0008.pdf]

**a** Site (vMAG proteomic abundance)  
anosim: ( $p=0.678$ ,  $R=-0.0252$ )

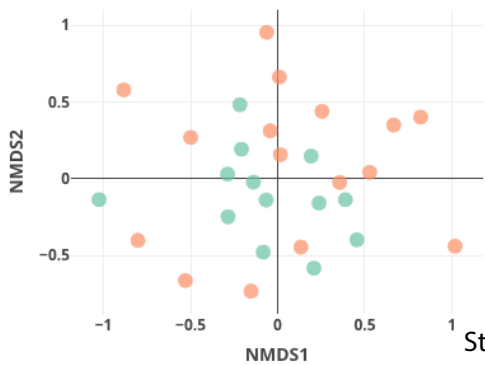

Stress = 0.2491456  
Linear Fit,  $R^2 = 0.973$

**b** Depth (vMAG proteomic abundance)  
anosim: ( $p=0.794$ ,  $R=-0.06203$ )

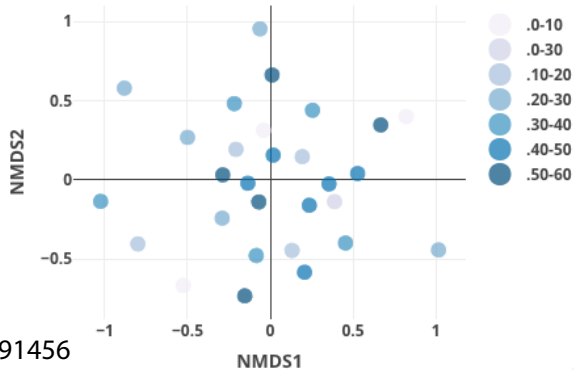

**c** Procrustes errors

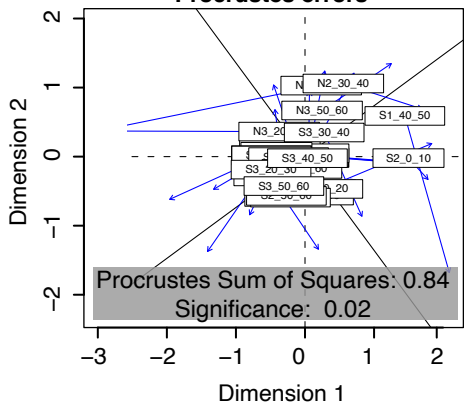

Procrustes errors

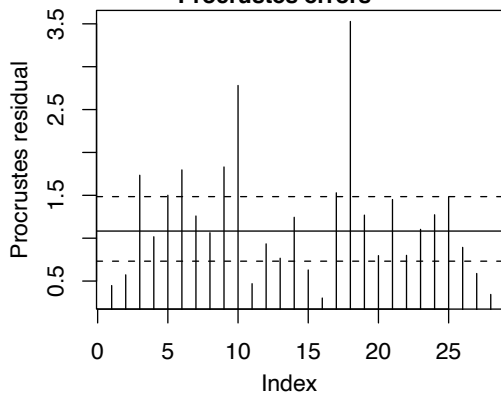

**d**

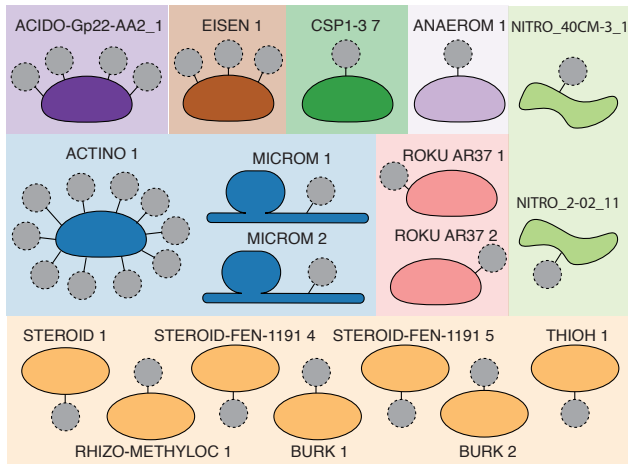

**e** List of vMAGs that putatively infect host

| List of vMAGs that putatively infect host                                               | MAG ID             |
|-----------------------------------------------------------------------------------------|--------------------|
| vMAG.23, vMAG.77, vMAG.79, vMAG.91                                                      | ACIDO-Gp22-AA2_1   |
| vMAG.6, vMAG.10, vMAG.13, vMAG.16, vMAG.29, vMAG.33, vMAG.74, vMAG.80, vMAG.83, vMAG.94 | ACTINO 1           |
| vMAG.7                                                                                  | MICROM 1           |
| vMAG.25                                                                                 | MICROM 2           |
| vMAG.50                                                                                 | ROKU AR37 1        |
| vMAG.62                                                                                 | ROKU AR37 2        |
| vMAG.48                                                                                 | ANAEROM 1          |
| vMAG.61                                                                                 | STERIOD 1          |
| vMAG.8                                                                                  | RHIZO-METHYLOC 1   |
| vMAG.63                                                                                 | STERIOD-FEN-1191 4 |
| vMAG.49                                                                                 | STERIOD-FEN-1191 5 |
| vMAG.106                                                                                | BURK 1             |
| vMAG.56                                                                                 | BURK 2             |
| vMAG.69                                                                                 | THIOH 1            |
| vMAG.47, vMAG.92, vMAG.105                                                              | EISEN 1            |
| vMAG.95                                                                                 | NITRO_40CM-3_1     |
| vMAG.112                                                                                | NITRO_2-02_11      |
| vMAG.28                                                                                 | CSP_1_3_7          |

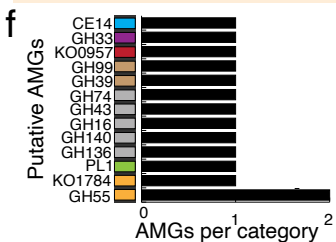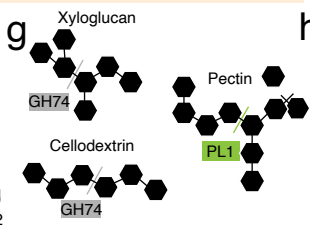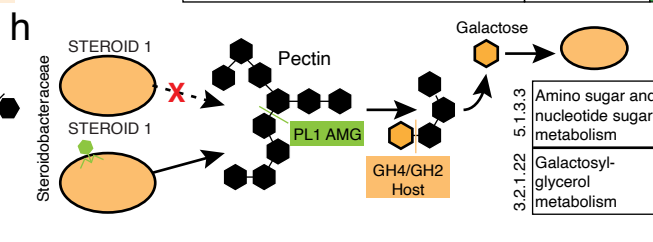

Glucose Pectin Multiple Uses Hemicellulose Sulfur Amidase Glyco-protein
