# Supplementary material
Source: PubMed Central journal article supplement (PMC9426555)
Supplement: reviewer-comments.pdf [file reviewer-comments.pdf]

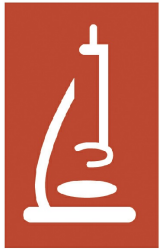

AMERICAN  
SOCIETY FOR  
MICROBIOLOGY

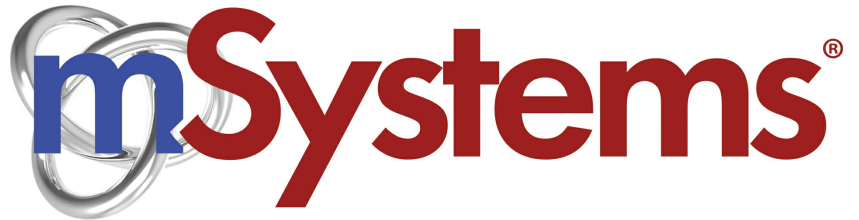

# Genome-resolved metaproteomics decodes the microbial and viral contributions to coupled carbon and nitrogen cycling in river sediments

Josue Rodríguez-Ramos, Mikayla Borton, Bridget McGivern, Garrett Smith, Lindsey Solden, Michael Shaffer, Rebecca Daly, Samuel Purvine, Carrie Nicora, Elizabeth Eder, Mary Lipton, David Hoyt, Stegen James C, and Kelly Wrighton

*Corresponding Author(s): Kelly Wrighton, Colorado State University*

---

## Review Timeline:

Submission Date:

June 10, 2022

Accepted:

June 29, 2022

---

*Editor: Laura Hug*

*Reviewer(s): The reviewers have opted to remain anonymous.*

## Transaction Report:

(Note: With the exception of the correction of typographical or spelling errors that could be a source of ambiguity, letters and reports are not edited. The original formatting of letters and referee reports may not be reflected in this compilation.)

**DOI:** <https://doi.org/10.1128/msystems.00516-22>

June 29, 2022

Dr. Kelly C Wrighton  
Colorado State University  
Fort Collins, Colorado

Re: mSystems00516-22 (Genome-resolved metaproteomics decodes the microbial and viral contributions to coupled carbon and nitrogen cycling in river sediments)

Dear Dr. Kelly C Wrighton:

Thank you for your careful revision of this manuscript.

Your manuscript has been accepted, and I am forwarding it to the ASM Journals Department for publication. For your reference, ASM Journals' address is given below. Before it can be scheduled for publication, your manuscript will be checked by the mSystems production staff to make sure that all elements meet the technical requirements for publication. They will contact you if anything needs to be revised before copyediting and production can begin. Otherwise, you will be notified when your proofs are ready to be viewed.

ASM policy requires that data be available to the public upon online posting of the article, so please verify all links to sequence records, if present, and make sure that each number retrieves the full record of the data. If a new accession number is not linked or a link is broken, provide production staff with the correct URL for the record. If the accession numbers for new data are not publicly accessible before the expected online posting of the article, publication of your article may be delayed; please contact the ASM production staff immediately with the expected release date.

As an open-access publication, mSystems receives no financial support from paid subscriptions and depends on authors' prompt payment of publication fees as soon as their articles are accepted.

**Publication Fees:**

You will be contacted separately about payment when the proofs are issued; please follow the instructions in that e-mail. Arrangements for payment must be made before your article is published. For a complete list of **Publication Fees**, including supplemental material costs, please visit our [website](#).

Corresponding authors may [join or renew ASM membership](#) to obtain discounts on publication fees. Need to upgrade your membership level? Please contact Customer Service at [Service@asmusa.org](mailto:Service@asmusa.org).

If you would like to submit a potential Featured Image, please email a file and a short legend to [mssystems@asmusa.org](mailto:mssystems@asmusa.org). Please note that we can only consider images that (i) the authors created or own and (ii) have not been previously published. By submitting, you agree that the image can be used under the same terms as the published article. File requirements: square dimensions (4" x 4"), 300 dpi resolution, RGB colorspace, TIF file format.

**For mSystems research articles**, you are welcome to submit a short author video for your recently accepted paper. Videos are normally 1 minute long and are a great opportunity for junior authors to get greater exposure. Importantly, this video will not hold up the publication of your paper, and you can submit it at any time.

Details of the video are:

- Minimum resolution of 1280 x 720
- .mov or .mp4. video format
- Provide video in the highest quality possible, but do not exceed 1080p
- Provide a still/profile picture that is 640 (w) x 720 (h) max
- Provide the script that was used

We recognize that the video files can become quite large, and so to avoid quality loss ASM suggests sending the video file via <https://www.wetransfer.com/>. When you have a final version of the video and the still ready to share, please send it to mSystems staff at [mssystems@asmusa.org](mailto:mssystems@asmusa.org).

Thank you for submitting your paper to mSystems.

Sincerely,

Laura Hug  
Editor, mSystems

Journals Department  
American Society for Microbiology  
1752 N St., NW  
Washington, DC 20036  
E-mail: [mSystems@asmusa.org](mailto:mSystems@asmusa.org)

Supplemental Figure 3: Accept  
Supplemental Table S3: Accept  
Supplemental Figure 2: Accept  
Supplemental Table S1: Accept  
Supplemental Figure 4: Accept  
Supplemental Figure 6: Accept  
Supplemental Table S2: Accept  
Supplemental Figure 5: Accept  
Supplemental Table S4: Accept  
Supplemental Figure 1: Accept
