# Supplementary material
Source: PubMed Central journal article supplement (PMC9426555)

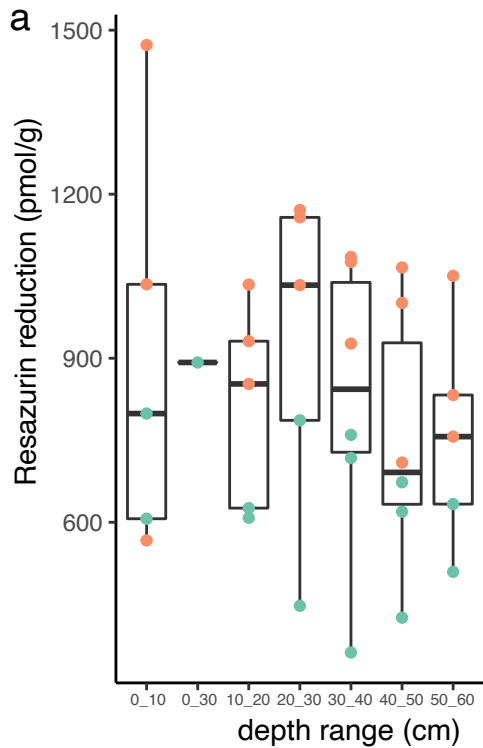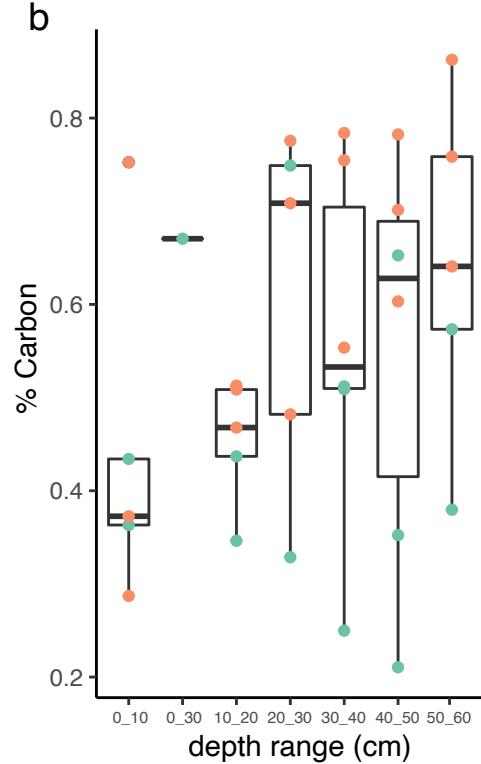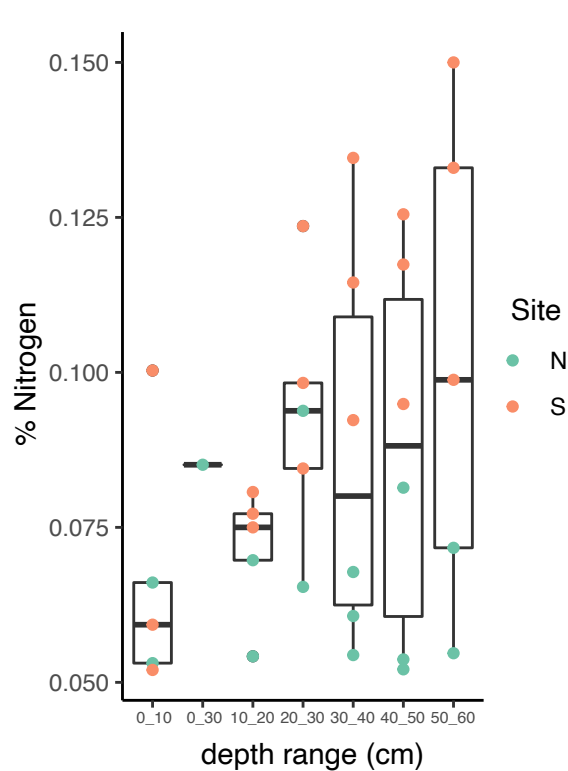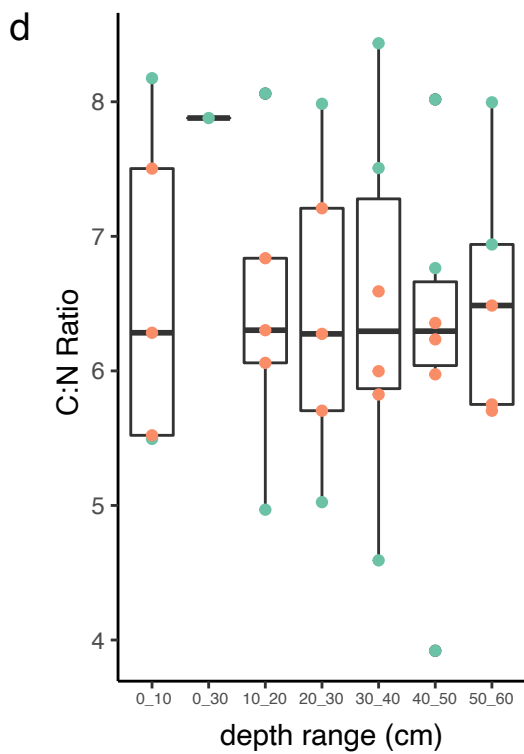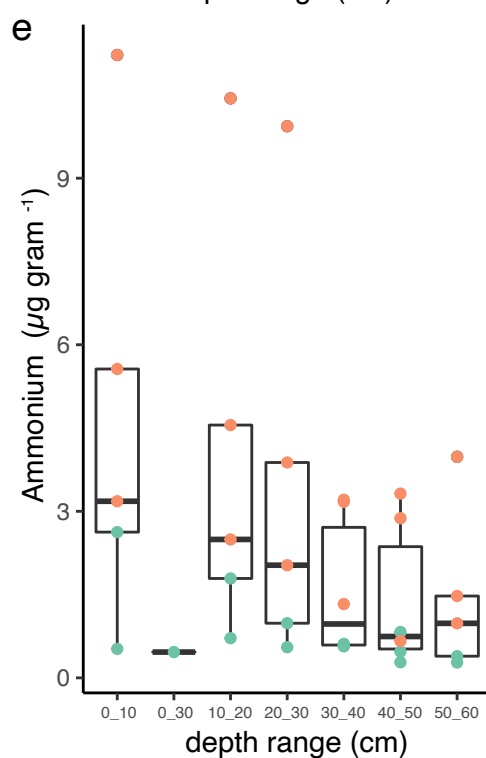

Supplement: msystems.00516-22-s0005.pdf [file msystems.00516-22-s0005.pdf]

**a**

Site (MAG proteomic abundance)  
anosim: ( $p=0.331$ ,  $R=0.007867$ )

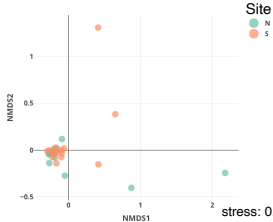**b**

Depth (MAG proteomic abundance)  
anosim: ( $p=0.2$ ,  $R=0.05187$ )

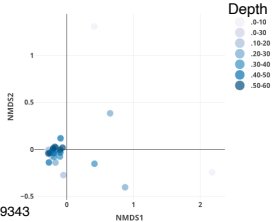**c**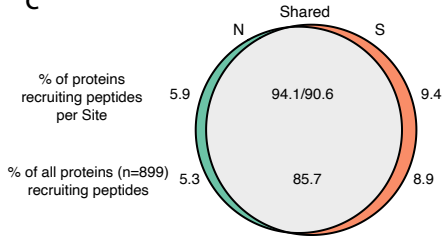

Supplement: msystems.00516-22-s0006.pdf [file msystems.00516-22-s0006.pdf]

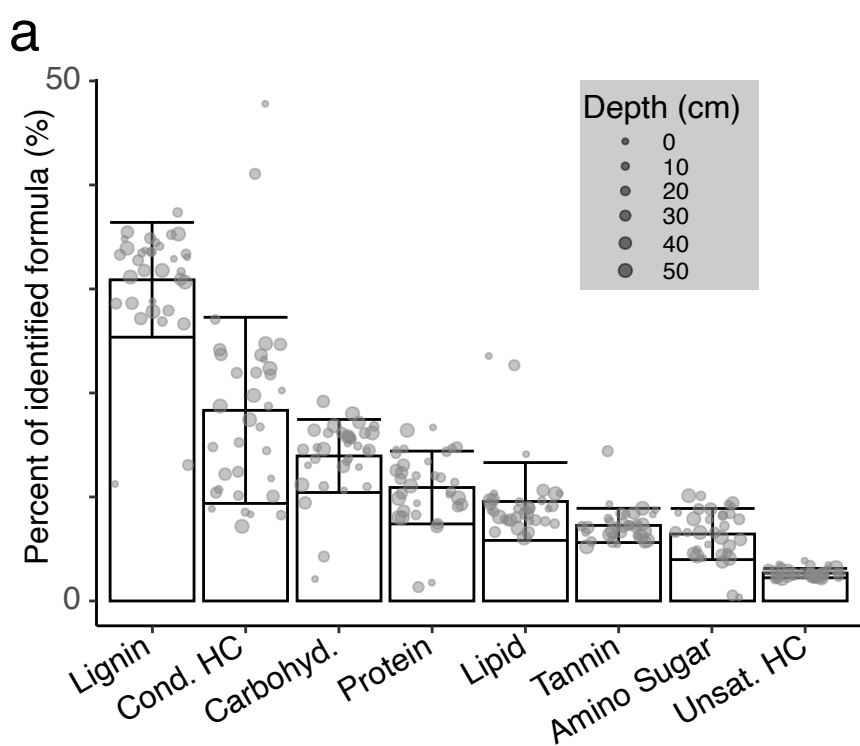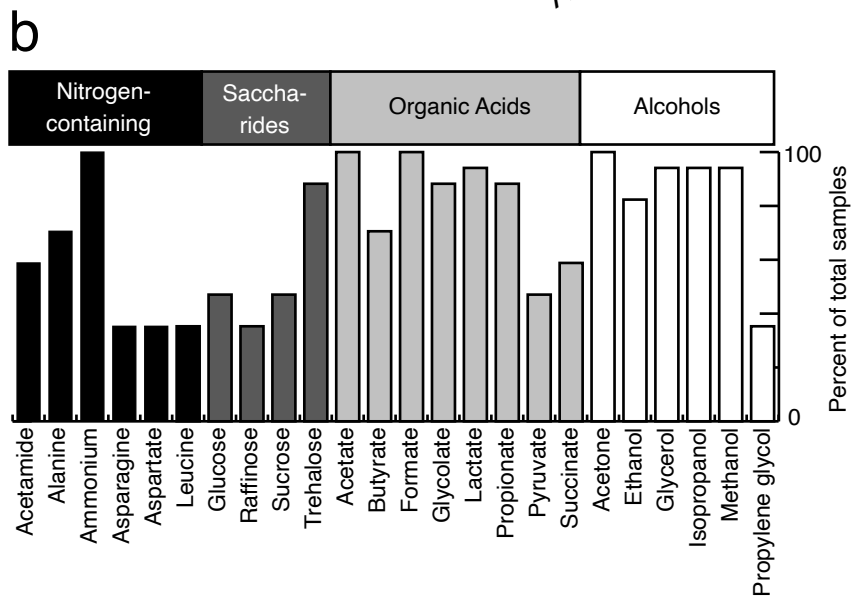

Supplement: msystems.00516-22-s0007.pdf [file msystems.00516-22-s0007.pdf]

**a**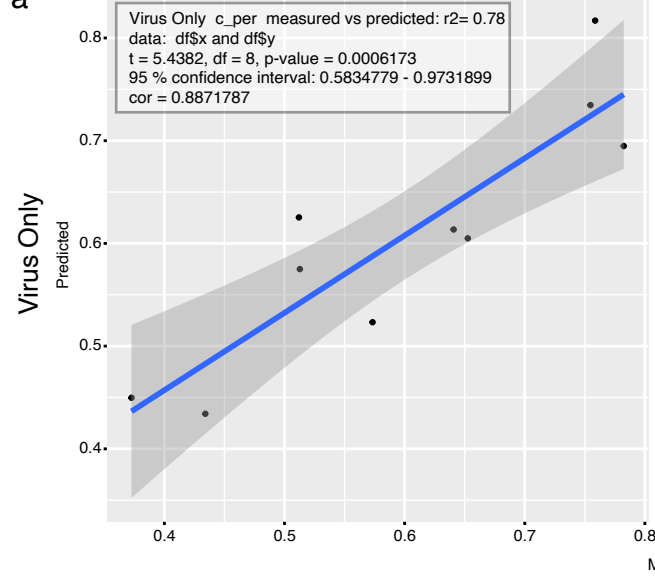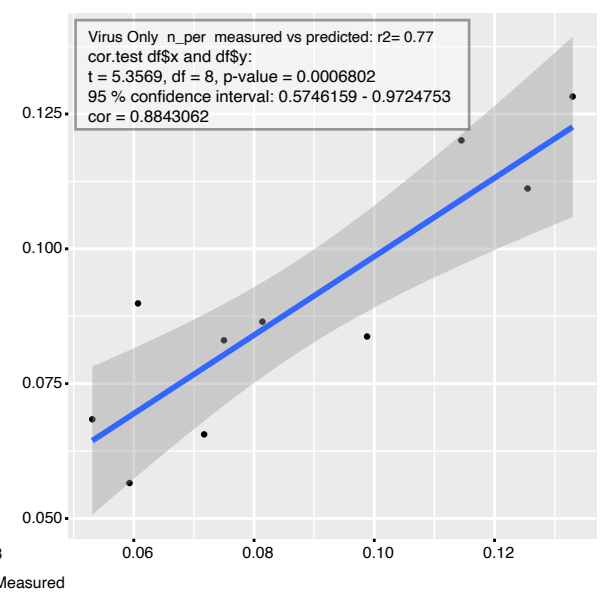**b**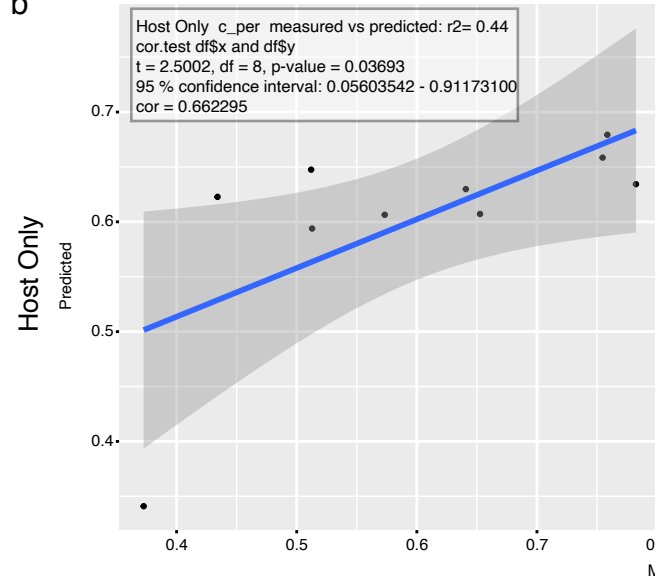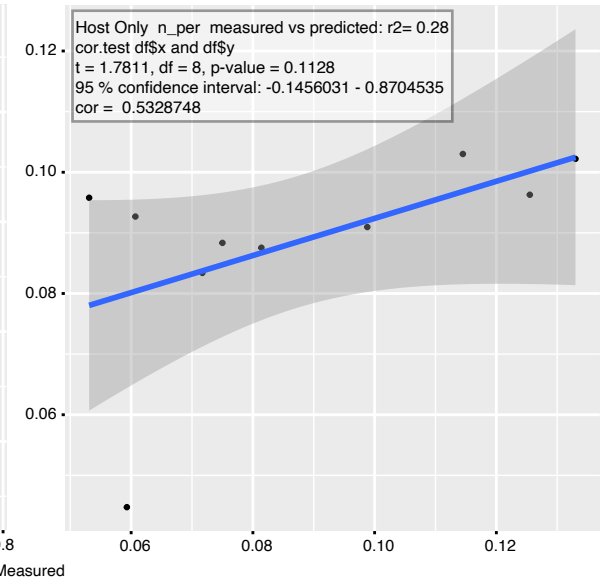**c**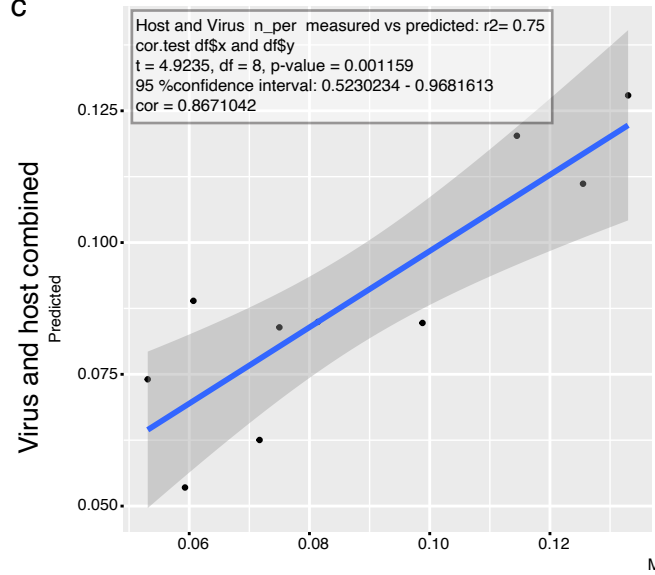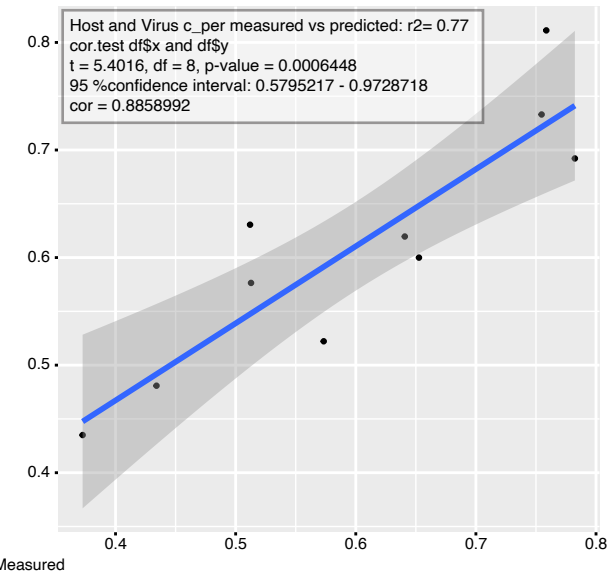

Supplement: msystems.00516-22-s0009.pdf [file msystems.00516-22-s0009.pdf]

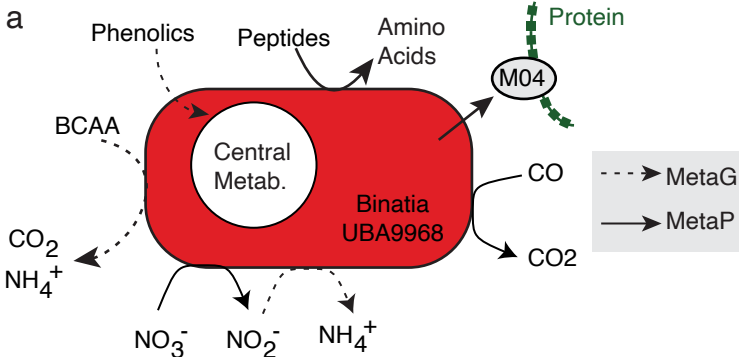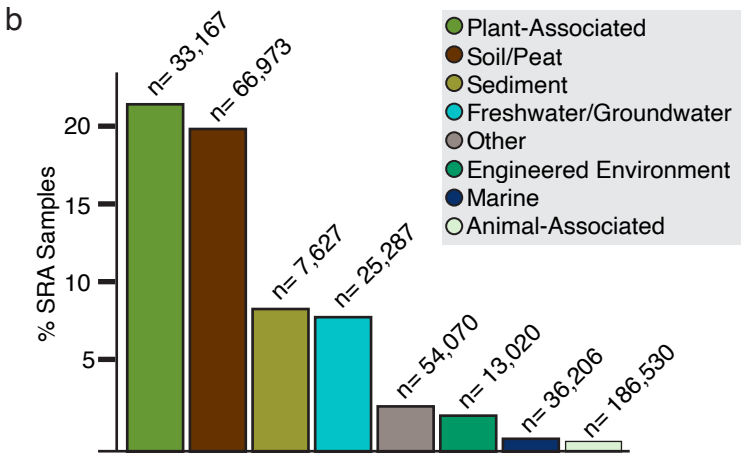

Supplement: msystems.00516-22-s0010.pdf [file msystems.00516-22-s0010.pdf]
